# Supplementary material
Source: publisher figshare collection journal article supplement (https://acs.figshare.com/ndownloader/files/5576504)
Supplement: Supplementary file 1 [file 5576504]

# Supporting Information

## Ionic Liquids Containing Block-Copolymer Based Supramolecules

Shuai Liu<sup>†§</sup>, Ting Xu<sup>\*†§</sup>

<sup>†</sup>Department of Chemistry, University of California, Berkeley, Berkeley, California 94720, United States

<sup>\*</sup>Department of Materials Science and Engineering, University of California, Berkeley, Berkeley, California 94720, United States

<sup>§</sup>Materials Sciences Division, Lawrence Berkeley National Laboratory, Berkeley, California 94720, United States

|                                                                       |        |
|-----------------------------------------------------------------------|--------|
| a) FTIR(Figure S1) and SAXS(Figure S2) -----                          | S2     |
| b) General Synthetic Methods -----                                    | S3     |
| c) Synthesis -----                                                    | S4-S6  |
| d) <sup>1</sup> H-NMR, <sup>13</sup> C-NMR, <sup>19</sup> F-NMR ----- | S7-S13 |
| e) HR-ESI -----                                                       | S14    |
| f) Reference -----                                                    | S15    |

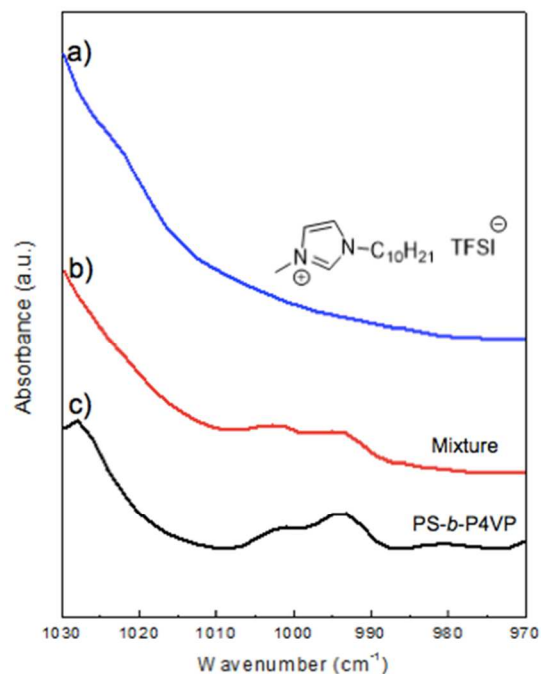

**Figure S1** FTIR spectra of a) reference small molecule: 1-methyl-3-decyl imidazolium bis(trifluoromethylsulfonyl)imide, b) mixture of BCP and small molecules and c) PS-*b*-P4VP

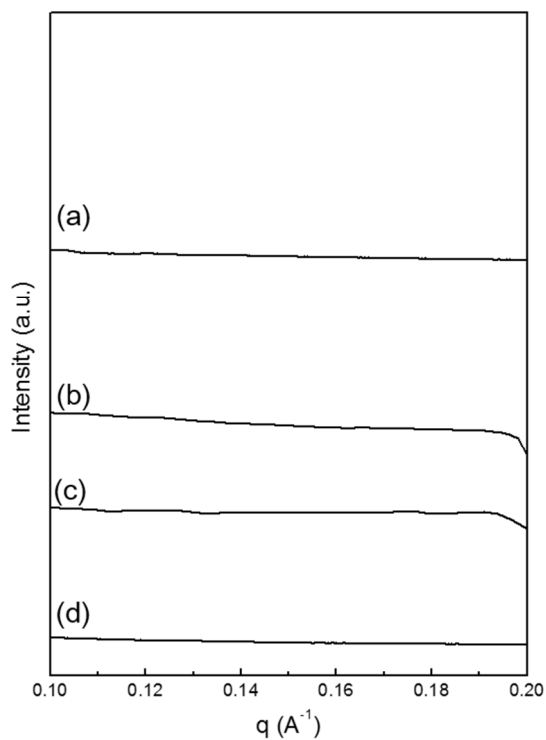

**Figure S2** Small Angle X-ray Scattering (SAXS) profiles at  $q$  from  $0.1 \text{ \AA}^{-1}$  to  $0.2 \text{ \AA}^{-1}$ . (a) PS-*b*-P4VP(ILC<sub>4</sub>I)<sub>1</sub> (b) PS-*b*-P4VP(ILC<sub>4</sub>TFSl)<sub>1</sub> (c) PS-*b*-P4VP(ILC<sub>10</sub>I)<sub>1</sub> (d)

PS-*b*-P4VP(ILC<sub>10</sub>TFSI)

## General Methods

All <sup>1</sup>H, <sup>13</sup>C, and <sup>19</sup>F NMR spectra were recorded on Bruker AVQ-400 MHz spectrometers and are referenced to residual solvent peaks (CDCl<sub>3</sub> <sup>1</sup>H NMR  $\delta$  = 7.26 ppm, <sup>13</sup>C NMR  $\delta$  = 77.16 ppm; DMSO-*d*<sub>6</sub> <sup>1</sup>H NMR  $\delta$  = 2.50 ppm, <sup>13</sup>C NMR  $\delta$  = 39.60 ppm). ESI mass spectrometry was performed on a Finnigan LTQFT (Thermo) spectrometer in positive ionization mode.

## Synthesis

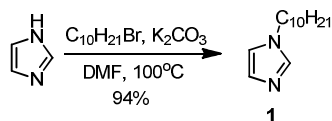

**Scheme S1.** Synthesis of **1**

**1-decylimidazole (1)** A 20 mL glass vial was charged with imidazole (0.75 g, 11 mmol, 1.1 equiv.) and  $\text{K}_2\text{CO}_3$  (1.78 g, 16.5 mmol, 1.65 equiv.) in DMF (8 mL). The reaction was stirred at  $100^{\circ}\text{C}$  overnight. Then, 1-bromodecane (2.21 g, 10 mmol, 1.0 equiv.) was added and the mixture was stirred for another 24 h. The solvent was removed under vacuum. Chloroform (15 mL) was added in residue and washed by water (15 mL) for three times. The organic layer was collected and dried by anhydrous  $\text{Na}_2\text{SO}_4$ . The solvent was removed under vacuum to yield **1** as light yellow oil (234 mg, 94%).  $^1\text{H}$  NMR (400 MHz,  $\text{CDCl}_3$ )  $\delta$  7.42 (s, 1H), 7.01 (s, 1H), 6.87 (s, 1H), 3.88 (t,  $J = 7.2$  Hz, 2H), 2.74 (m, 2H), 1.94 – 1.54 (m, 2H), 1.43 – 1.13 (m, 12H), 0.84 (t,  $J = 6.9$  Hz, 3H).  $^{13}\text{C}$  NMR (101 MHz,  $\text{CDCl}_3$ )  $\delta$  137.03, 129.26, 118.77, 47.05, 31.85, 31.08, 29.48, 29.43, 29.26, 29.07, 26.54, 22.67, 14.12. which were consistent with report<sup>1</sup>.

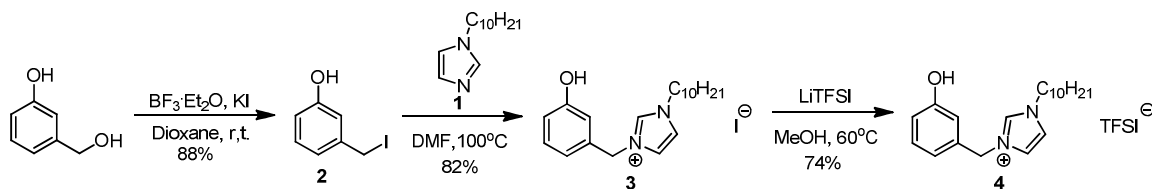

**Scheme S2.** Syntheses of **2-4**

**3-(iodomethyl)phenol (2)** A 250 mL round bottom flask was charged with 3-hydroxymethylphenol (5.01 g, 40 mmol, 1.0 equiv.) and KI (7.03 g, 42 mmol, 1.05 equiv.) in dry 1,4-dioxane (100 mL). The reaction mixture was stirred at room temperature for 30 min under nitrogen gas. Then, boron trifluoride diethyl etherate (5.3 mL, 42 mmol, 1.05 equiv.) was added into the mixture. The reaction mixture was stirred for another 5 h at room temperature. Then the solvent was removed under vacuum. The residue was dissolved in chloroform (300 mL) and wash by water (200 mL) for three times. The organic layer was collected and dried by anhydrous  $\text{Na}_2\text{SO}_4$  and concentrated on a rotary evaporator. Column chromatography (silica gel; 10:1 hexane/ethyl acetate) yielded **2** (8.18g, 88%) as white powder.  $^1\text{H}$  NMR (400 MHz,  $\text{CDCl}_3$ )  $\delta$  7.17 (m, 1H), 6.96 (d,  $J = 7.6$  Hz, 1H), 6.86 (s, 1H), 6.73 (d,  $J = 8.1$  Hz, 1H), 5.44 (s, 1H), 4.39 (s, 2H).  $^{13}\text{C}$  NMR (101 MHz,  $\text{CDCl}_3$ )  $\delta$  155.50, 141.00, 130.18, 121.34, 115.75, 115.21, 5.51. which were consistent with report<sup>2</sup>.

**1-decyl-3-(3-hydroxybenzyl) imidazolium iodide (ILC<sub>10</sub>I, 3)** A 20 mL glass vial was charged with 3-(iodomethyl)phenol (**2**) (0.92 g, 4 mmol, 1.0 equiv) and 1-decylimidazole (**1**) (0.83 g, 4 mmol, 1.0 equiv.) in DMF (10 mL). The reaction mixture was stirred at 100 °C overnight. The solvent was removed under vacuum. Chloroform (20 mL) was added into the residue and washed by water (20 mL) for three times. The organic layer was collected and dried by anhydrous Na<sub>2</sub>SO<sub>4</sub> and concentrated on a rotary evaporator. Column chromatography (silica gel; gradient elution from 1:1 ethyl acetate/hexane to 20:1 ethyl acetate/methanol) yielded **3** (1.44g, 82%) as yellow oil. <sup>1</sup>H NMR (400 MHz, CDCl<sub>3</sub>) δ 9.77 (s, 1H), 7.37 (m, 1H), 7.33 (m, 1H), 7.24 (s, 1H), 7.15 (d, *J* = 7.8 Hz, 1H), 7.04 – 6.98 (m, 1H), 6.90 – 6.84 (m, 1H), 5.40 (s, 2H), 4.36 – 4.14 (m, 2H), 2.11 – 1.75 (m, 2H), 1.44 – 1.18 (m, 14H), 0.91 (t, *J* = 6.9 Hz, 3H). <sup>13</sup>C NMR (101 MHz, CDCl<sub>3</sub>) δ 157.27, 135.64, 134.29, 130.44, 122.48, 120.06, 119.63, 117.24, 116.05, 52.95, 50.42, 31.85, 30.14, 29.47, 29.40, 29.26, 28.98, 26.27, 22.67, 14.15. FTMS (HR-ESI positive): [C<sub>20</sub>H<sub>31</sub>O<sub>1</sub>N<sub>2</sub>]<sup>+</sup> cal. 315.2431; found, 315.2427

**1-decyl-3-(3-hydroxybenzyl) imidazolium bis(trifluoromethylsulfonyl)imide (ILC<sub>10</sub>TFSI, 4)** A 4 mL glass vial was charged with 1-decyl-3-(3-hydroxybenzyl) imidazolium iodine (**3**) (221 mg, 0.5 mmol, 1.0 equiv) and lithium bis(trifluoromethylsulfonyl)imide (214 mg, 0.75 mmol, 1.5 equiv.) in methanol (2 mL). The reaction mixture was stirred at 60 °C overnight. The solvent was removed under vacuum. Chloroform (5 mL) was added in residue and washed by water (5 mL) for three times. The organic layer was collected and dried by anhydrous Na<sub>2</sub>SO<sub>4</sub>. The solvent was removed under vacuum to yield **4** as light yellow oil (218 mg, 74%). <sup>1</sup>H NMR (400 MHz, CDCl<sub>3</sub>) δ 8.68 (s, 1H), 7.30 – 7.15 (m, 3H), 6.93 – 6.79 (m, 3H), 5.17 (s, 2H), 4.17 – 4.05 (m, 2H), 2.02 – 1.64 (m, 2H), 1.26 (m, 14H), 0.87 (t, *J* = 6.9 Hz, 3H). <sup>13</sup>C NMR (101 MHz, CDCl<sub>3</sub>) δ 157.07, 134.74, 133.58, 130.62, 122.27, 120.18, 116.79, 115.44, 99.85, 53.22, 50.15, 31.69, 29.81, 29.25, 29.13, 29.07, 28.68, 25.97, 22.51, 13.94.

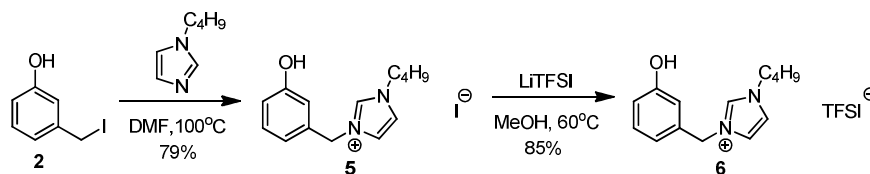

**Scheme S3.** Syntheses of **5** and **6**

**1-butyl-3-(3-hydroxybenzyl) imidazolium iodide (ILC<sub>4</sub>I, 5)** A 20 mL glass vial was charged with 3-(iodomethyl)phenol (**2**) (1.15 g, 4 mmol, 1.0 equiv) and 1-butylimidazole (0.62 g, 5 mmol, 1.0 equiv.) in DMF (10 mL). The reaction mixture was stirred at 100 °C overnight. The solvent was removed under vacuum. Chloroform (20 mL) was added into the residue and washed by water (20 mL) for three times. The opaque organic layer was collected and dried by anhydrous Na<sub>2</sub>SO<sub>4</sub> and concentrated on a rotary evaporator. Column chromatography (silica gel; gradient elution from 1:1 ethyl acetate/hexane to 20:1 ethyl acetate/methanol) yielded **5** (1.40g, 79%) as

yellow oil.  $^1\text{H}$  NMR (400 MHz, DMSO)  $\delta$  9.70 (s, 1H), 9.30 (s, 1H), 7.81 (m, 2H), 7.20 (d,  $J$  = 7.8 Hz, 1H), 6.86 – 6.69 (m, 3H), 5.34 (s, 2H), 4.19 (t,  $J$  = 7.2 Hz, 2H), 3.50 (s, 28H), 2.51 (s, 2H), 1.83 – 1.71 (m, 2H), 1.25 (dt,  $J$  = 14.8, 7.4 Hz, 2H), 0.89 (t,  $J$  = 7.4 Hz, 3H).  $^{13}\text{C}$  NMR (101 MHz, DMSO)  $\delta$  157.92, 136.30, 136.21, 130.34, 122.93, 122.82, 118.80, 115.83, 115.12, 52.13, 48.92, 31.47, 19.00, 13.49. FTMS (HR-ESI positive):  $[\text{C}_{14}\text{H}_{19}\text{O}_1\text{N}_2]^+$  cal. 231.1492; found, 231.1490

**1-butyl-3-(3-hydroxybenzyl) imidazolium bis(trifluoromethylsulfonyl)imide (ILC<sub>4</sub>TFSI, 6)**

A 4mL glass vial was charged with 1-butyl-3-(3-hydroxybenzyl) imidazolium iodine (**5**) (179 mg, 0.5 mmol, 1.0 equiv) and lithium bis(trifluoromethylsulfonyl)imide (214 mg, 0.75 mmol, 1.5 equiv.) in methanol (2 mL). The reaction mixture was stirred at 60 °C overnight. The solvent was removed under vacuum. Chloroform (5 mL) was added in residue and washed by water (5 mL) for three times. The organic layer was collected and dried by anhydrous  $\text{Na}_2\text{SO}_4$ . The solvent was removed under vacuum to yield **6** as light yellow oil (215 mg, 85%).  $^1\text{H}$  NMR (400 MHz, DMSO)  $\delta$  9.71 (s, 1H), 9.25 (s, 1H), 7.77 (m, 2H), 7.21 (m, 1H), 6.86 – 6.70 (m, 3H), 5.31 (s, 2H), 4.17 (t,  $J$  = 7.2 Hz, 2H), 1.87 – 1.65 (m, 2H), 1.24 (dt,  $J$  = 14.8, 7.4 Hz, 2H), 0.89 (t,  $J$  = 7.4 Hz, 3H).  $^{13}\text{C}$  NMR (101 MHz, DMSO)  $\delta$  158.04, 136.31, 130.38, 122.95, 122.90, 121.34, 118.83, 118.14, 115.92, 115.20, 52.25, 49.00, 31.54, 19.05, 13.43.  $^{19}\text{F}$  NMR (376 MHz, DMSO)  $\delta$  -78.02.

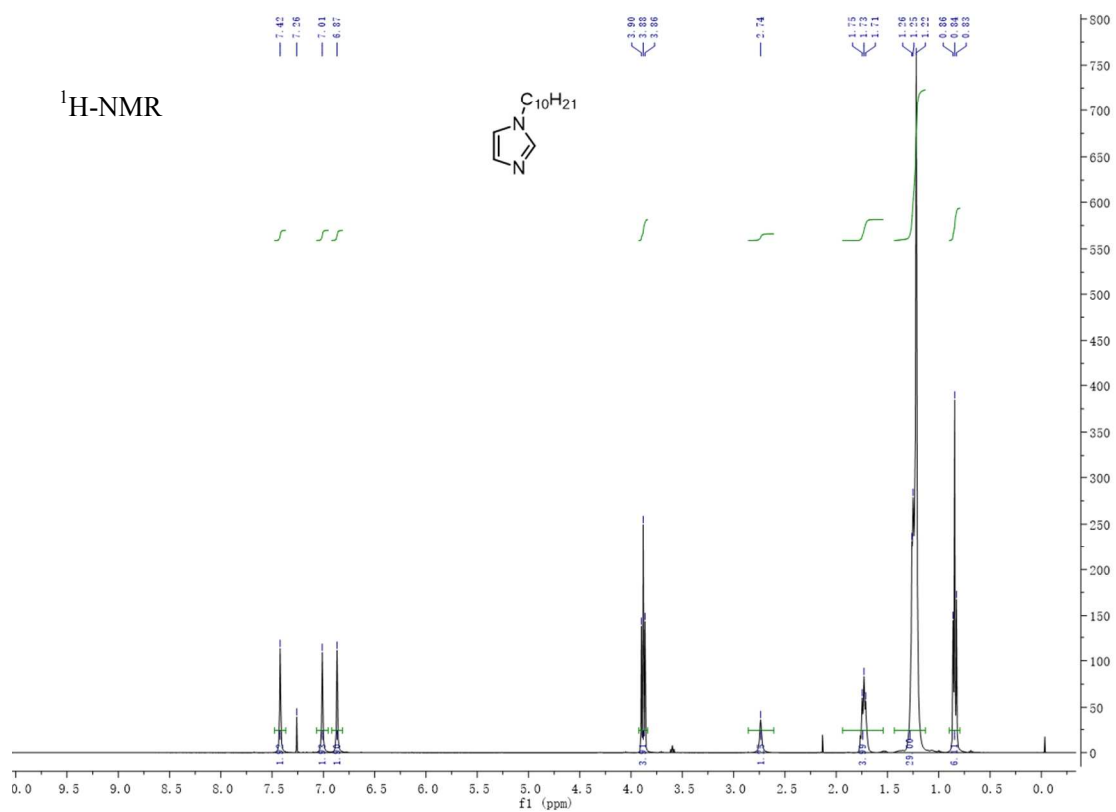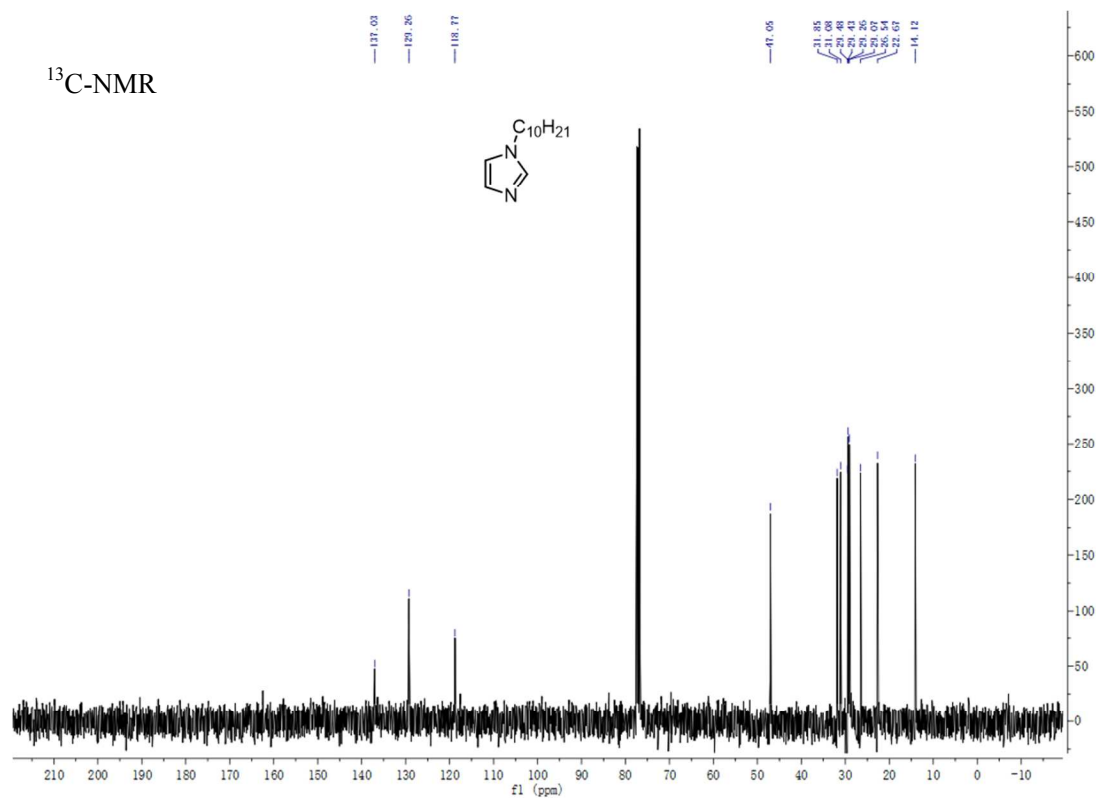

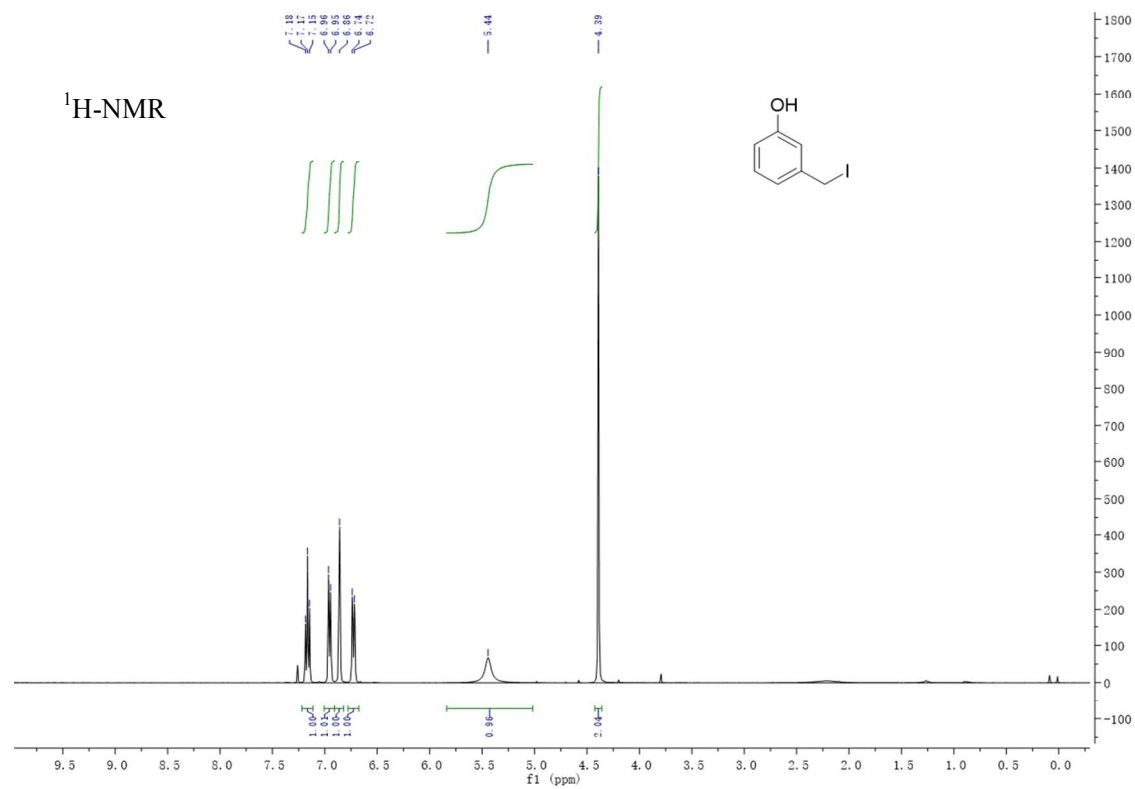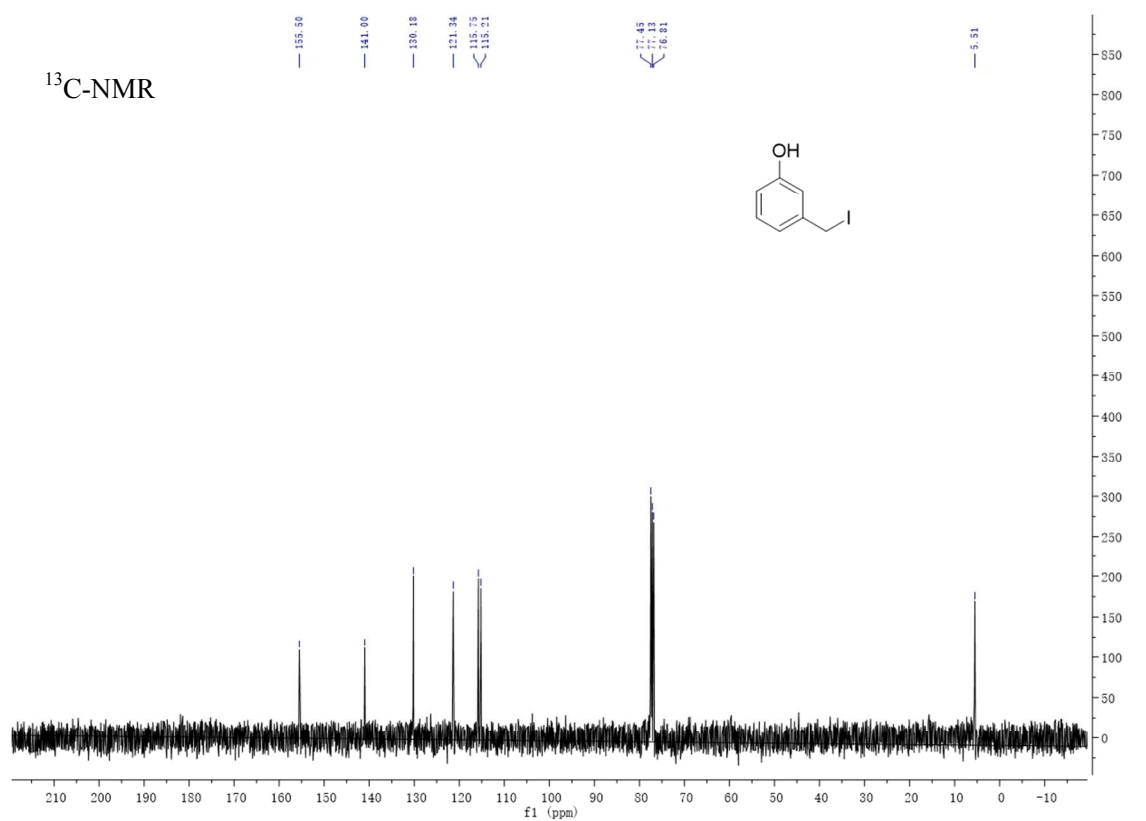



<sup>1</sup>H-NMR

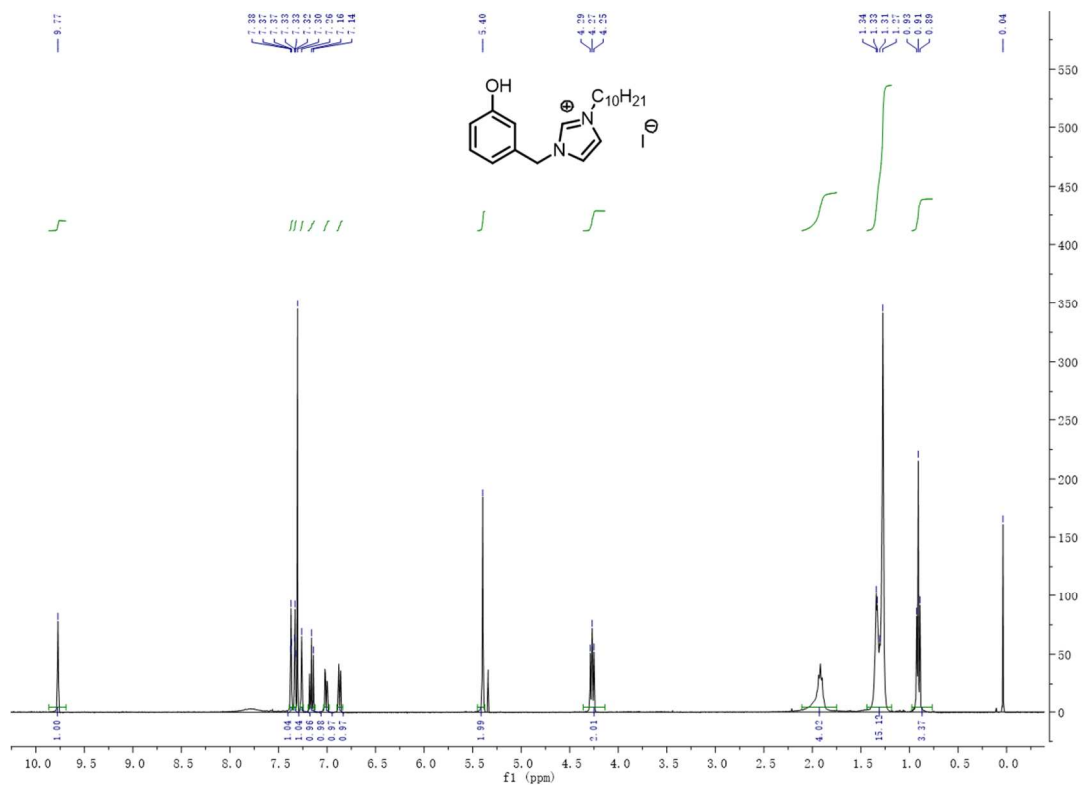

<sup>13</sup>C-NMR

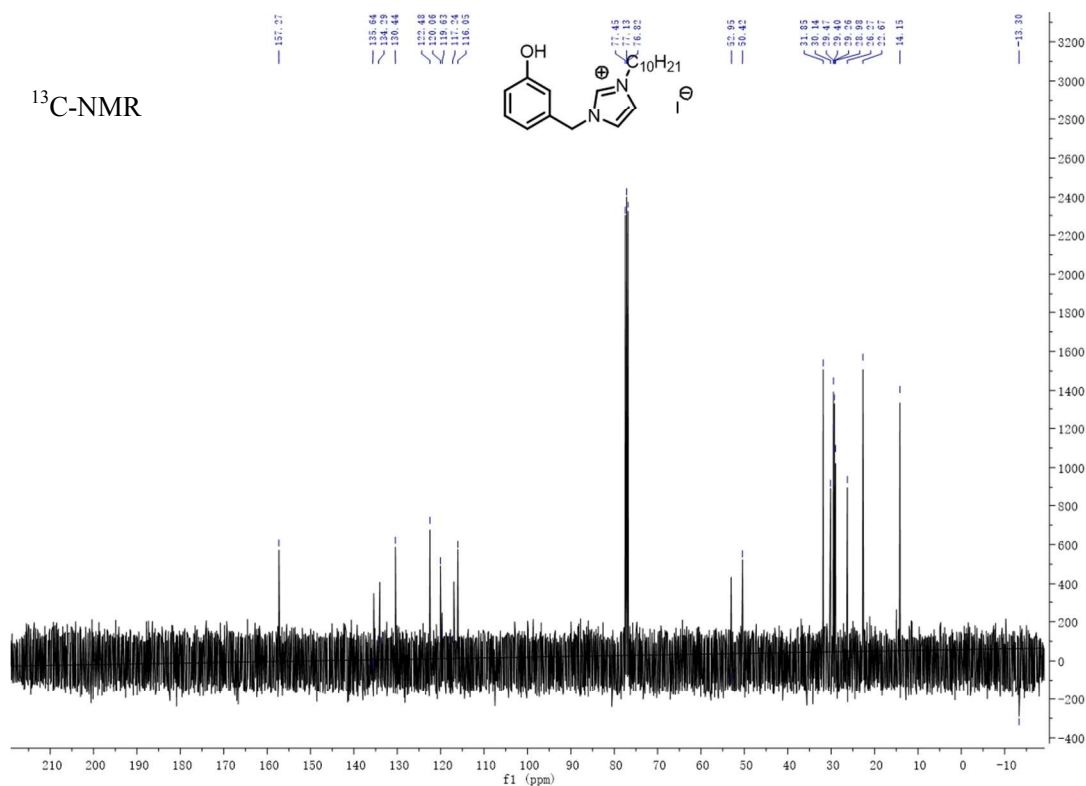

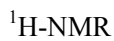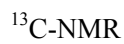

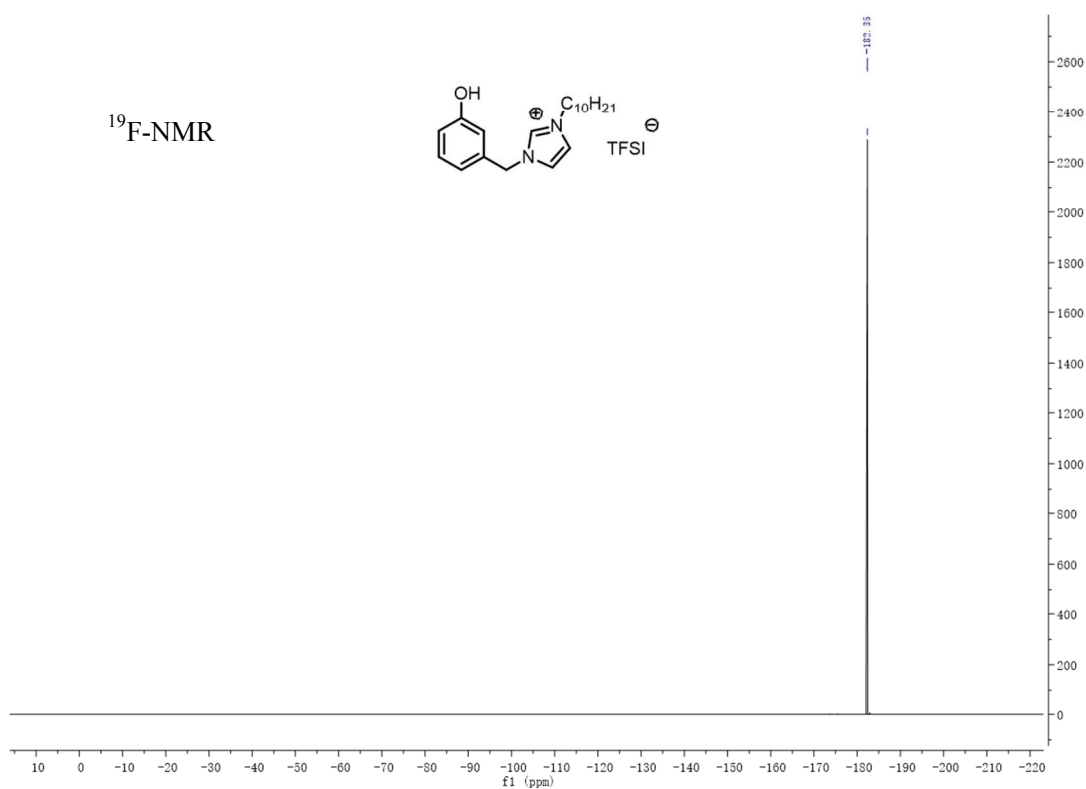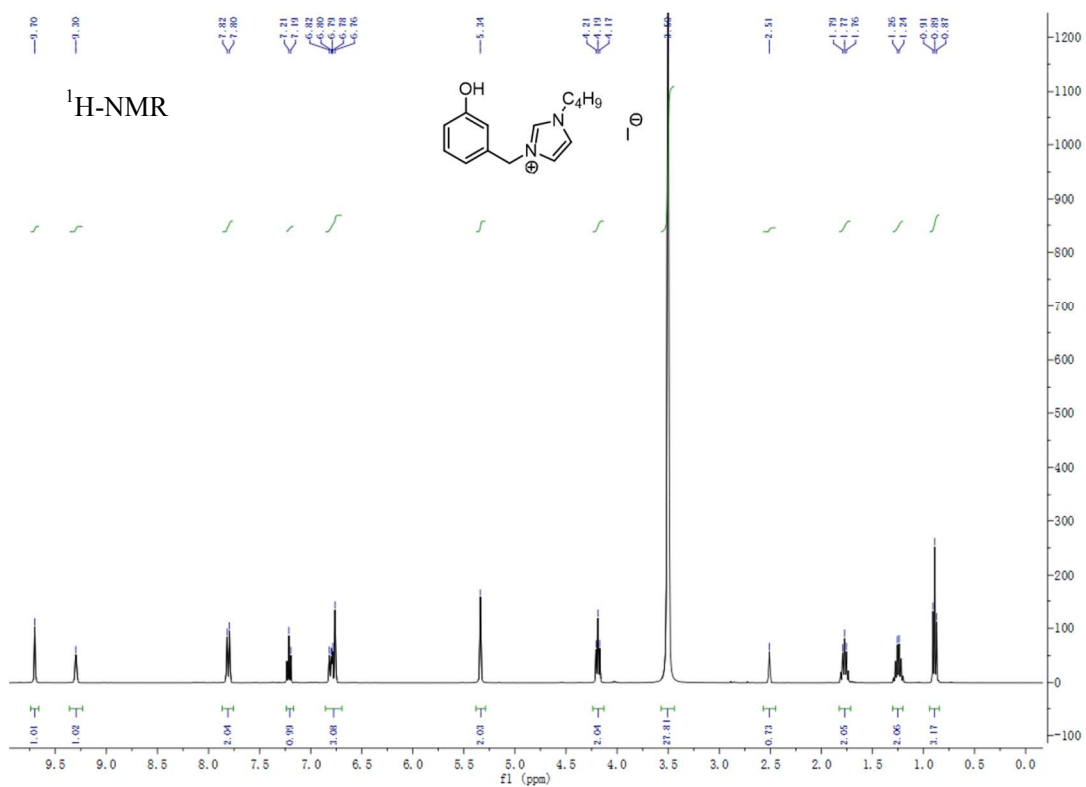



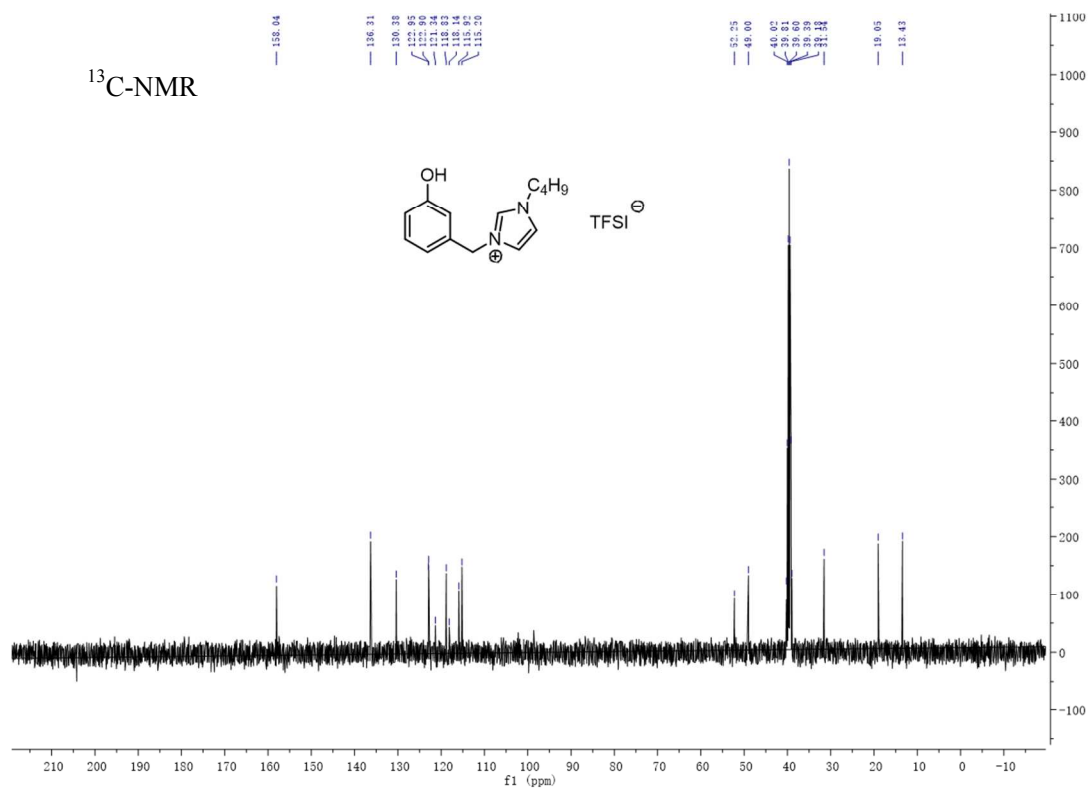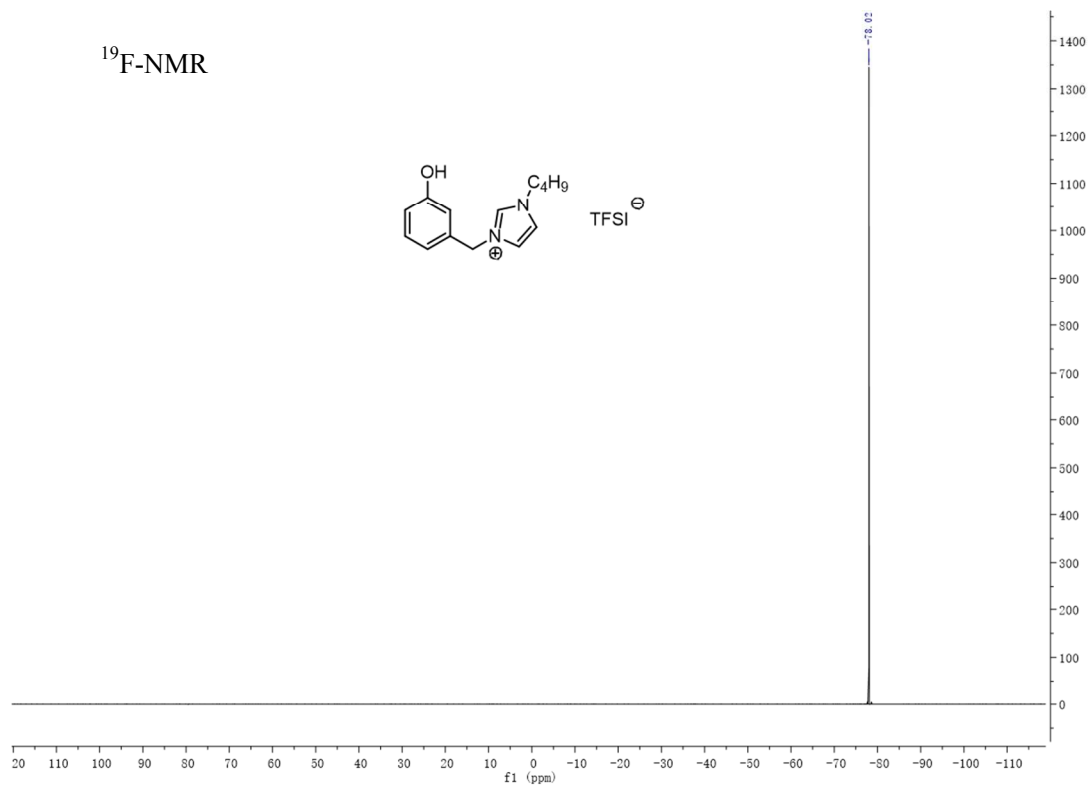

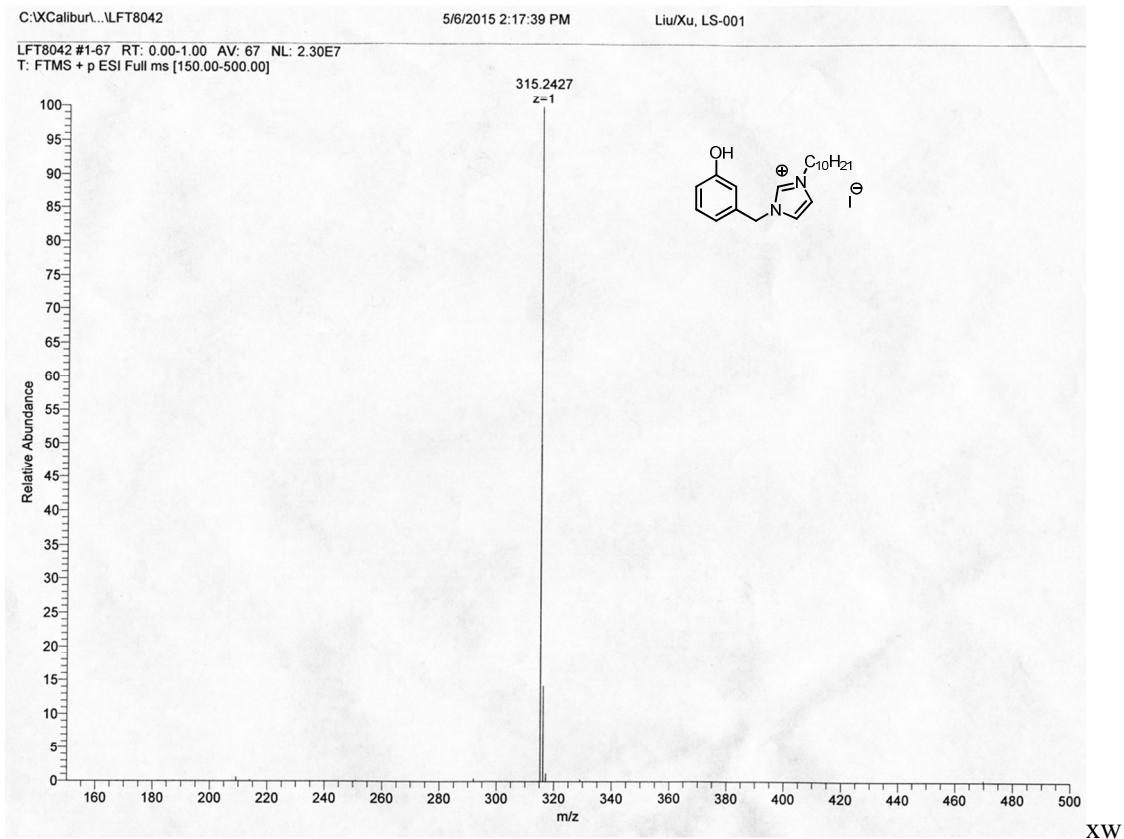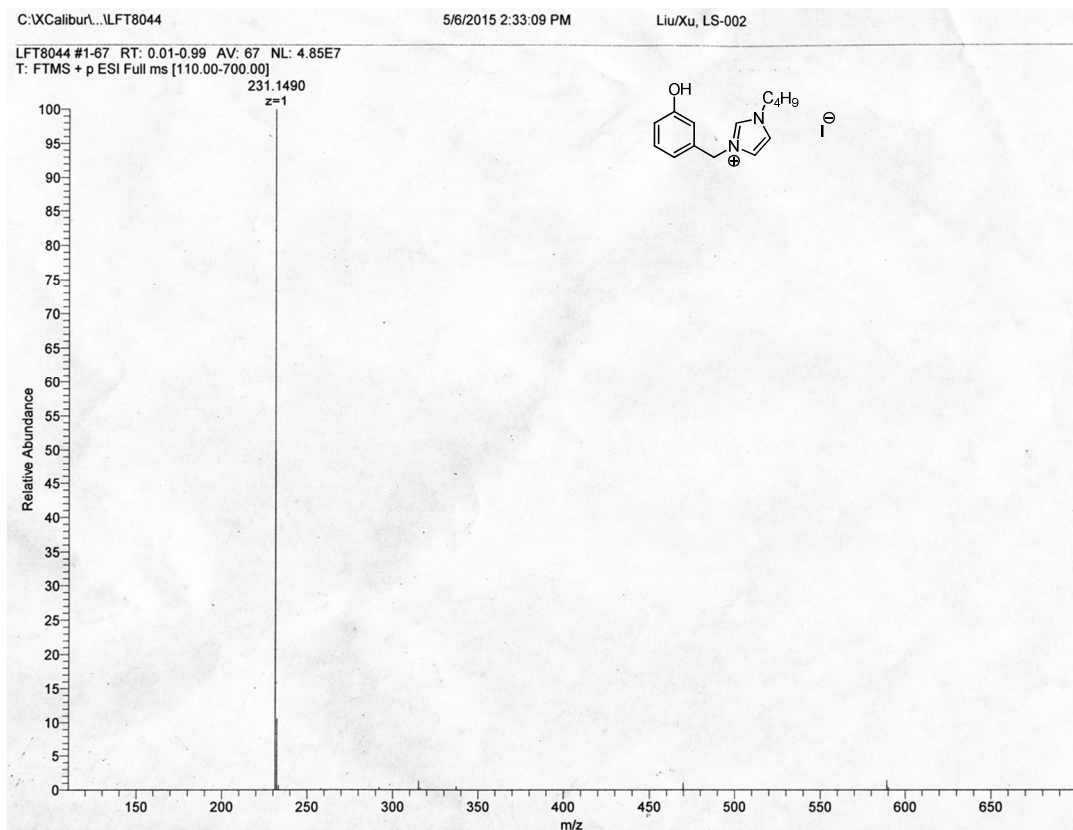

## Reference

- (1) Lee, M.; Choi, U. H.; Wi, S.; Slebodnick, C.; Colby, R. H.; Gibson, H. W. *Journal of Materials Chemistry* **2011**, *21*, 12280.
- (2) Tromp, R. A.; van Ameijde, S.; Pütz, C.; Sundermann, C.; Sundermann, B.; von Frijtag Drabbe Künzel, J. K.; IJzerman, A. P. *Journal of medicinal chemistry* **2004**, *47*, 5441.
